# Supplementary material
Source: PubMed Central journal article supplement (PMC4116680)

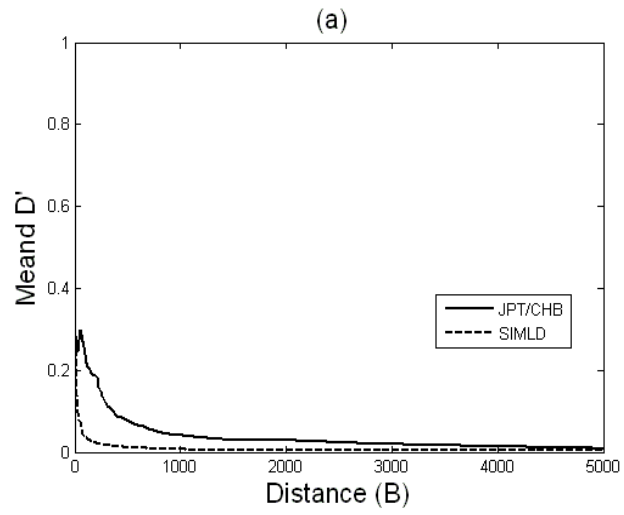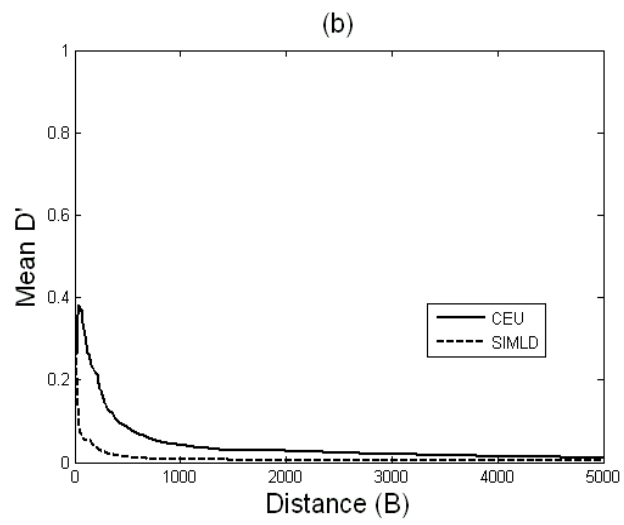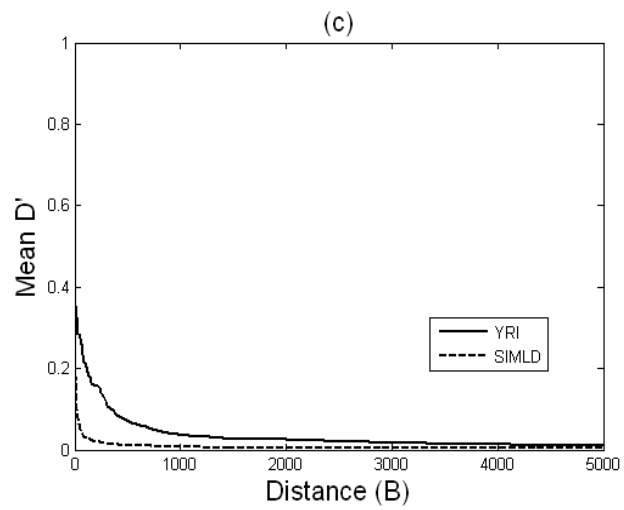

**Supplementary Fig. 4**

Supplement: NIHMS601678-supplement-2011_BCG_FIG4.pdf [file NIHMS601678-supplement-2011_BCG_FIG4.pdf]

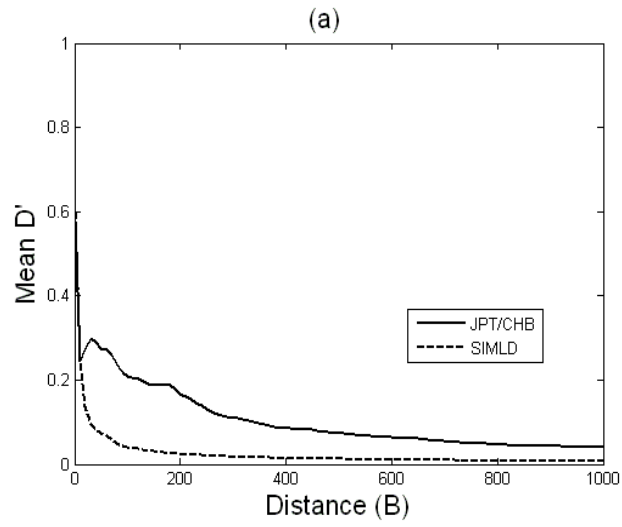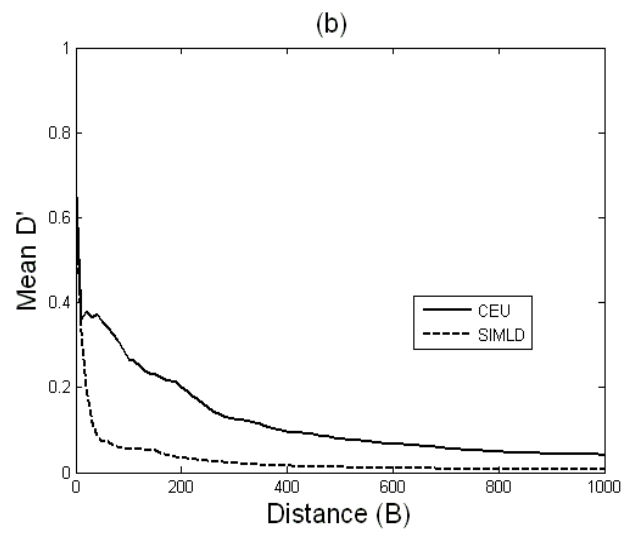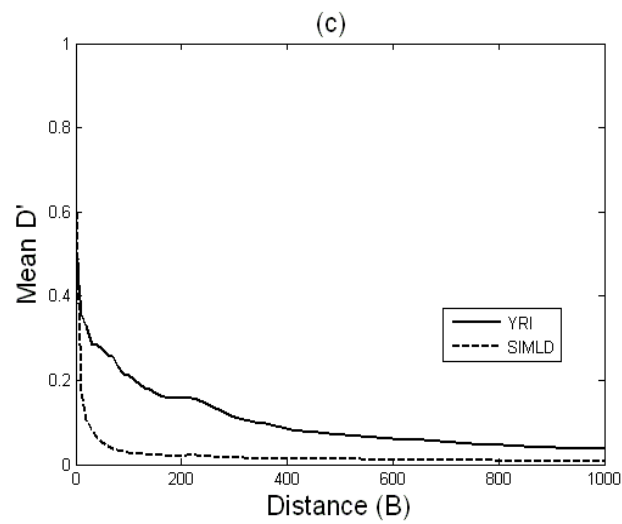

Supplementary Fig. 2

Supplement: NIHMS601678-supplement-2011_BCG_FIGURE2.pdf [file NIHMS601678-supplement-2011_BCG_FIGURE2.pdf]

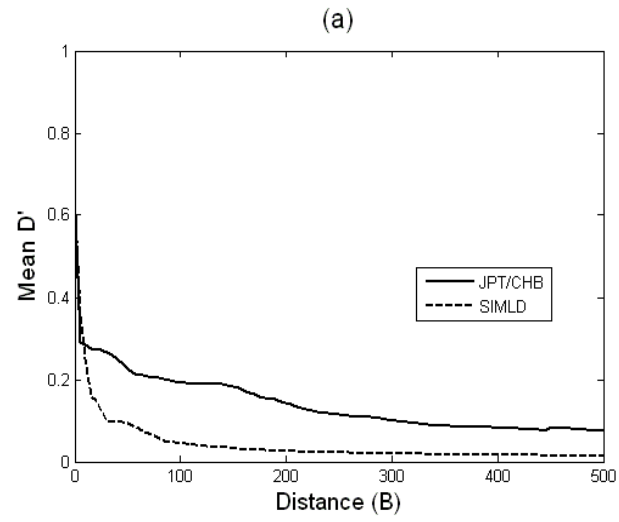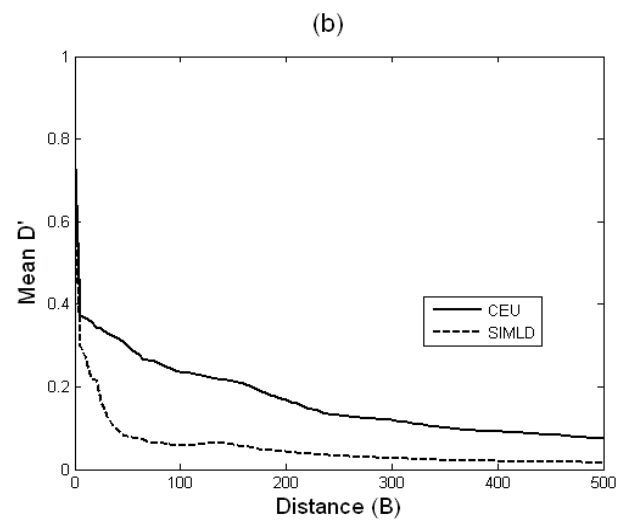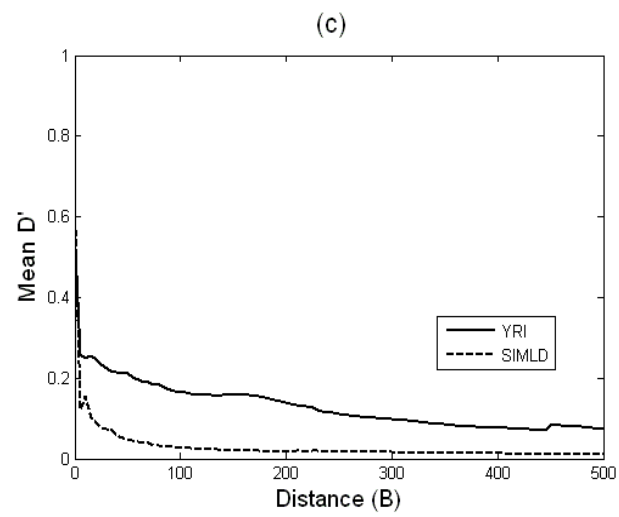

Supplementary Fig. 1

Supplement: NIHMS601678-supplement-2011_BCG_Fig1.pdf [file NIHMS601678-supplement-2011_BCG_Fig1.pdf]
